# Supplementary material for: Seroprevalence, seroconversion, and seroreversion of infection-induced SARS-CoV-2 antibodies among a cohort of children and adolescents in Montreal, Canada
Source: bioRxiv or medRxiv preprint supplement (doi:10.1101/2022.10.28.22281660), 2022-10-30

**Figure 1 Directed acyclic graph for seroconversion regression analysis to identify the minimally sufficient adjustment set for household income**

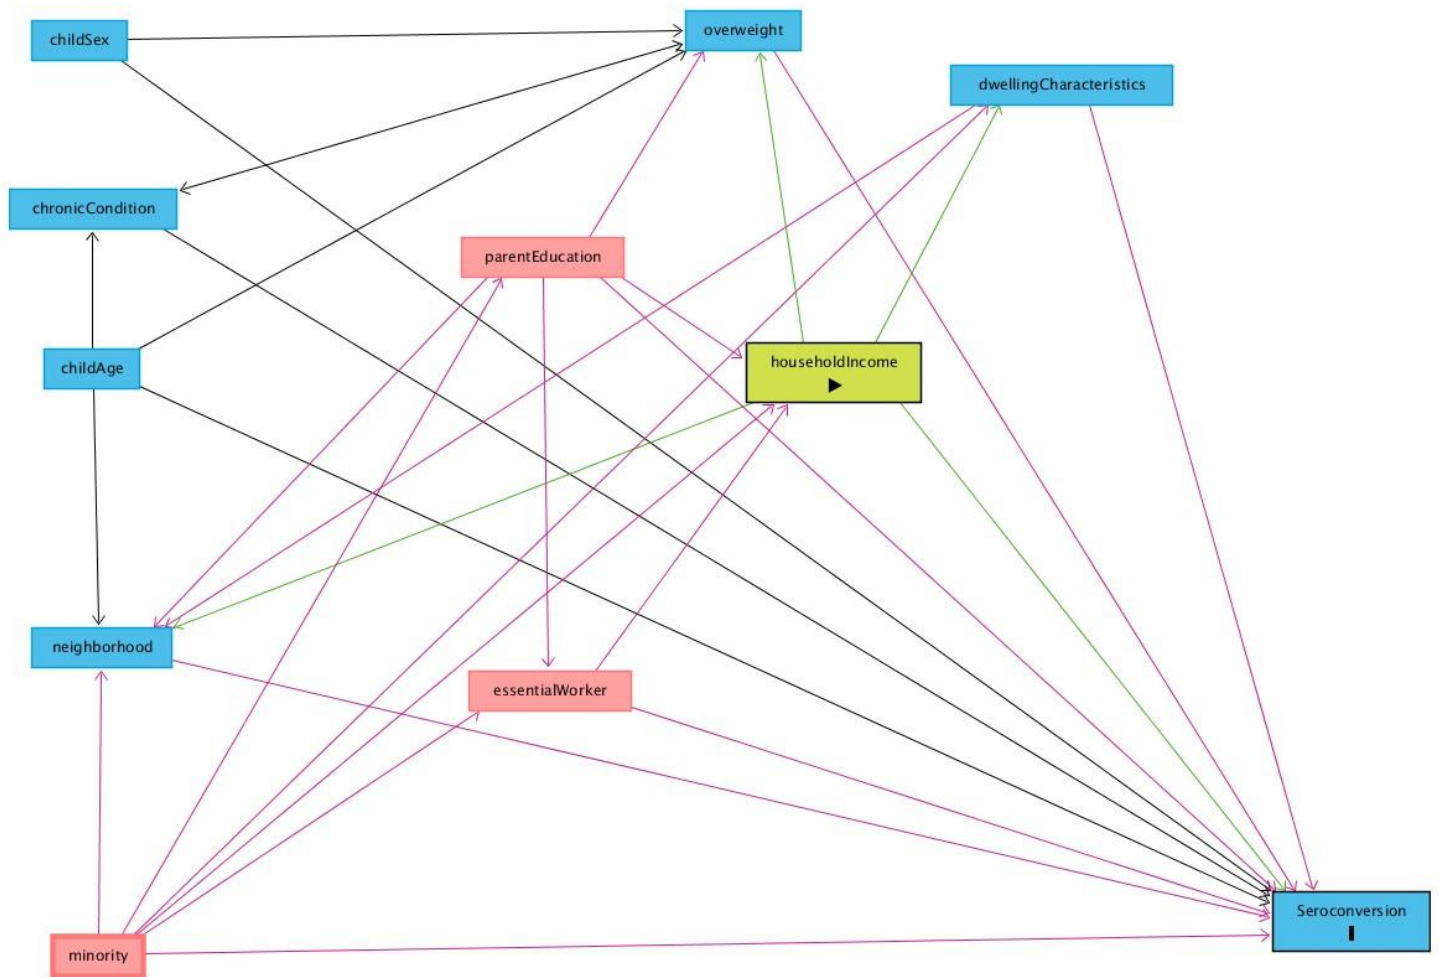

Supplement: Supplementary file [file media-2.pdf]
